# Supplementary material
Source: HighWire-hosted journal article supplement (https://bmjopen.bmj.com/content/6/10/e012839)

Supplementary File 3. Image of straight knee calf raise with hack squat machine

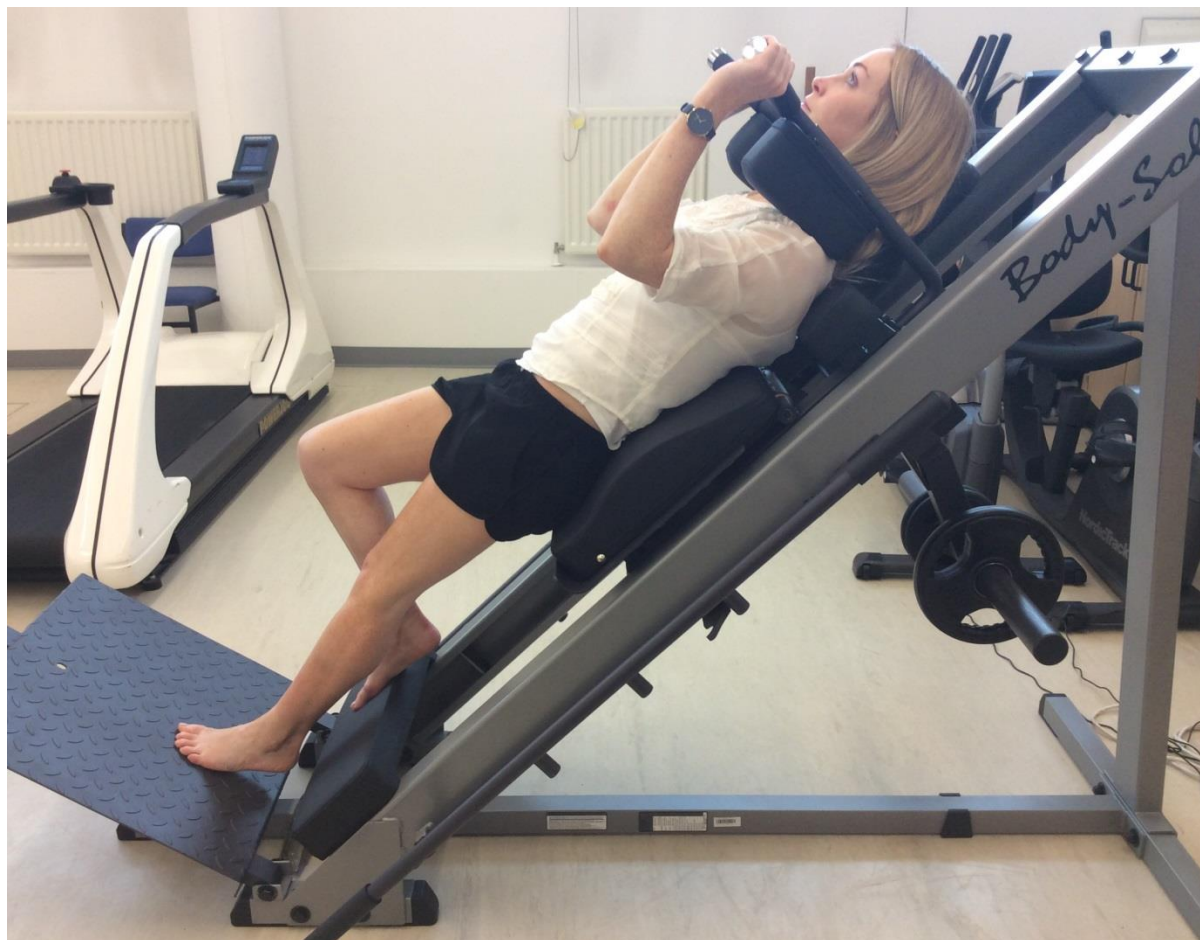

Supplement: inline-supplementary-material-3 [file inline-supplementary-material-3.pdf]
